# Supplementary material
Source: PubMed Central journal article supplement (PMC3725939)
Supplement: Supp_Fig1.pdf [file Supp_Fig1.pdf]

## Supplementary Data

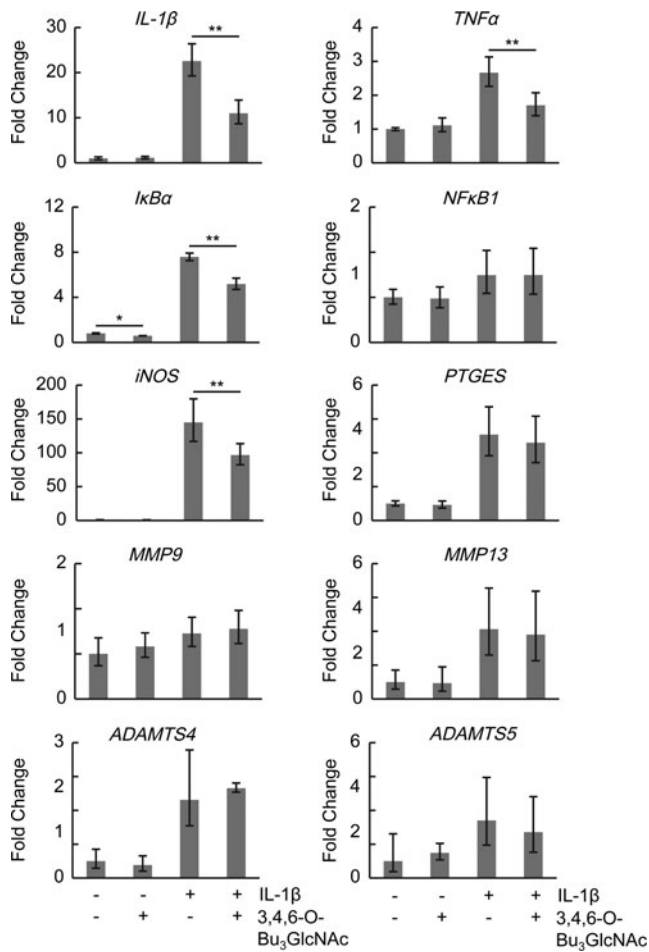

**SUPPLEMENTARY FIG. S1.** Effect of 50  $\mu$ M 3,4,6-O-tributanoylated-N-acetylglucosamine (3,4,6-O-Bu<sub>3</sub>GlcNAc) exposure on chondrocytes cultured with or without interleukin-1 $\beta$  (IL-1 $\beta$ ) in monolayer after 4 h of exposure ( $n=3$ , \* $p < 0.05$ , \*\* $p < 0.01$  vs. the negative control with respective IL-1 $\beta$  concentration).
