# Supplementary material
Source: PubMed Central journal article supplement (PMC3725939)
Supplement: Supp_Fig2.pdf [file Supp_Fig2.pdf]

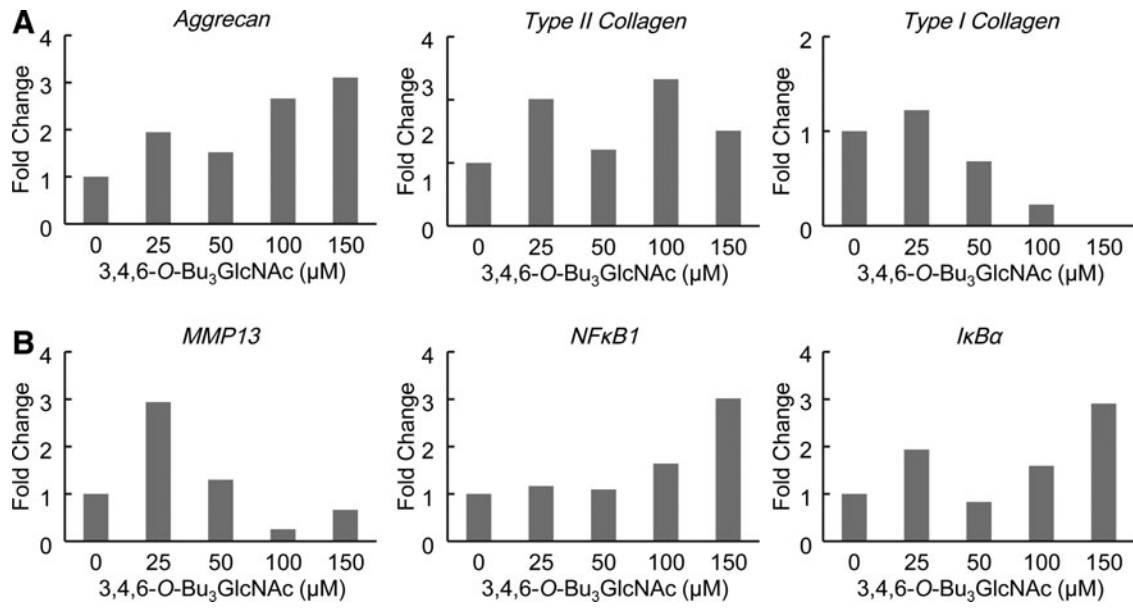

**SUPPLEMENTARY FIG. S2.** Effect of 3,4,6-O-Bu<sub>3</sub>GlcNAc exposure on gene expression of chondrocytes cultured without IL-1 $\beta$  in three-dimensional hydrogels. **(A)** Gene expression changes for the extracellular matrix markers *aggrecan*, *type II collagen* and *type I collagen*. **(B)** Gene expression changes for the inflammatory markers *MMP13*, *NFκB1*, and *IκBα*.
