# Supplementary material
Source: PubMed Central journal article supplement (PMC3725939)
Supplement: Supp_Table1.pdf [file Supp_Table1.pdf]

SUPPLEMENTARY TABLE S1. LIST OF PRIMERS  
FOR REAL-TIME PCR

| <i>Gene</i>             | <i>Sequence</i>                                          |
|-------------------------|----------------------------------------------------------|
| <i>Aggrecan</i>         | F-CATCGGGCTTGCCAGAGTT<br>R-ACTGGTGTCCACGAACGTAATG        |
| <i>Type I collagen</i>  | F-GGGCAACAGCAGATTCACCTAC<br>R-CAAGGATAGGCAGGCGAGAT       |
| <i>Type II collagen</i> | F-GCAACCCTGGAAGTATGGA<br>R-GCTCACCCGTTTGACTTTT           |
| <i>IκBα</i>             | F-GCAGGCCACCAACTACAATG<br>R-AGTGACACCAGTTCGGGATT         |
| <i>NFκB1</i>            | F-TTACAAAACCAGCCTCCGTG<br>R-GCCGAAACTGTCCGAGAAA          |
| <i>MMP9</i>             | F-TAGCACGCACGACATCTTTC<br>R-GAAGGTCACGTAGCCACAT          |
| <i>MMP13</i>            | F-GCTCACGCTTTCCTCCT<br>R-CAAACCTCATGGGCAGCAACA           |
| <i>ADAMTS4</i>          | F-TCGAAGCCGGGACAGGGAGG<br>R-CCTCCCGGGATGCGAGTCCA         |
| <i>ADAMTS5</i>          | F-TCACTGCCTACTTAGCCCTGAA<br>R-GCTCCAACCGCTGTAGTTCAT      |
| <i>IL-1β</i>            | F-CGTCTTCCTGGGACATTTTCG<br>R-TGCCAGTCCTCGGGGTATT         |
| <i>TNFα</i>             | F-ACACCATGAGCACCAAAAGC<br>R-GCAACCAGGAGGAAGGAGAA         |
| <i>iNOS</i>             | F-CCGCTCCCGTCCTTGCATCC<br>R-CCGCCCTGGAGCCCTTTGTG         |
| <i>PTGES</i>            | F-TGCCTCAGAGCCCACCGGAAT<br>R-AGTGCATCCGGGCGACGAAG        |
| <i>Beta actin</i>       | F-TGGCACCACCTTCTACAATGAGC<br>R-GCACAGCTTCTCCTTAATGTCACGC |

*iNOS*, inducible nitric oxide synthase; *IL-1β*, interleukin-1β; *MMP*, matrix metalloproteinase; *NFκB*, nuclear factor κB; *TNFα*, tumor necrosis factor-α.
